# Supplementary material
Source: Research Square preprint supplement (doi:10.21203/rs.3.rs-8929390/v1)
Supplement: Supplementary file 1 [file fd12b9b2b1caa8ccabdd0dd4.docx]

**Appendix A**: Detailed Calculation of Uncertainty Analysis

**A.1. Uncertainty of Nanofluid Entropy Rate (Tube Side – Cold Fluid)**

Substituting numerical values:

**A2. Uncertainty of Hot-Fluid Entropy Rate (Shell Side – Hot Fluid)**

Substituting numerical values:

**A3. Overall Uncertainty in Entropy Generation**

Substituting numerical values:

=

**A4. Uncertainty in Exergy Destruction**

Substituting numerical values:
